# Supplementary material for: A subpopulation of astrocyte progenitors defined by Sonic hedgehog signaling
Source: PubMed Central journal article supplement (PMC8759290; doi:10.1186/s13064-021-00158-w), 2022-01-14
Supplement: 13064_2021_158_MOESM1_ESM.pdf [file 13064_2021_158_MOESM1_ESM.pdf]

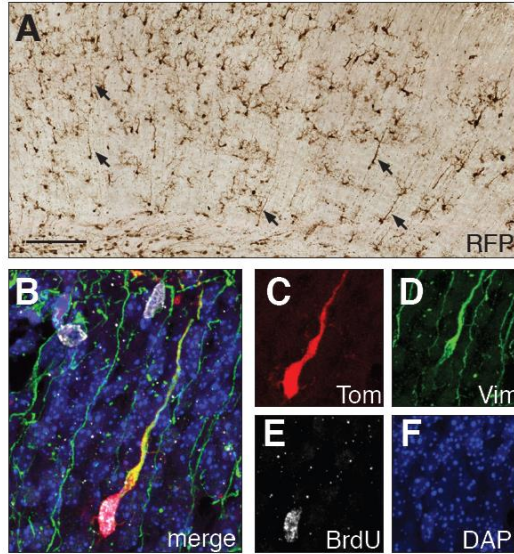

**Supplemental Figure 1. Marked cells show characteristics of transitional radial glia. (A)** Brightfield immunostaining for RFP in the cortex of a mouse at P3 after receiving tamoxifen at P0 showing many cells with transitional morphologies and the appearance of residual radial glial fibers. Scale bar, 25  $\mu\text{m}$  **(B-F)** Colocalization of tdTom (C, red), vimentin (D, green), and BrdU (E, gray) in the cortex of *Gli1<sup>Cre</sup>ER/+;Ai14* mice at P3 after tamoxifen at P0. Merged image in (B), single channel images in C-F.
